# Supplementary material for: Integrating ultrathin and modified NiCoAl-layered double-hydroxide nanosheets with N-doped reduced graphene oxide for high-performance all-solid-state supercapacitors
Source: Royal Society of Chemistry journal article supplement (doi:10.1039/c9nr02357g), 2019-01-01
Supplement: c9nr02357g1.pdf [file c9nr02357g1.pdf]

## Electronic Supplementary Information (SI) for

### Integration of ultrathin and modified NiCoAl-layered double hydroxide nanosheets with N-doped reduced graphene oxide for high-performance all-solid-state supercapacitors

Fei Liu,<sup>a</sup> Yuyun Chen,<sup>b</sup> Ying Liu,<sup>a</sup> Jianchun Bao,<sup>a</sup> Min Han,<sup>\*a</sup> and Zhihui Dai<sup>\*a</sup>

<sup>a</sup> Jiangsu Key Laboratory of Biofunctional Materials, School of Chemistry and Materials Science, Nanjing Normal University, Nanjing 210023, P. R. China

<sup>b</sup> School of Chemistry and Chemical Engineering, Guangxi University for Nationalities, Nanning 530008, P. R. China

\*To whom correspondence should be addressed.

**Email:** 07203@njnu.edu.cn (Prof. M. Han);

daizhihui@njnu.edu.cn (Prof. Z. Dai)

**Tel/Fax:** +86-25-85891051

#### **This information contains:**

- (1) Digital photographs for m-LDH/NRG NHs, pure m-LDH and NRG dispersions (Figure S1)
- (2) The HAADF-STEM images for pure NiCoAl-LDH and m-LDH nanosheets as well as m-LDH/NRG NHs (**Figure S2**)
- (3) The mapping analysis for N element in the m-LDH/NRG (**Figure S3**)
- (4) Raman for NiCoAL-LDH, m-LDH and m-LDH/NRG at 200 to 1000 cm<sup>-1</sup> (**Figure S4**)
- (5) Raman for NRG and m-LDH/NRG at 1100 to 1900 cm<sup>-1</sup> (**Figure S5**)
- (6) The survey XPS spectrum for m-LDH/NRG NHs (**Figure S6**)
- (7) Fine core-level XPS spectra of NiCoAl-LDH (**Figure S7**)
- (8) Fine core-level XPS spectra of m-LDH (**Figure S8**)
- (9) N<sub>2</sub> sorption isothermal plots for m-LDH/NRG NHs and NiCoAl-LDH nanosheets (**Figure S9**)

(10) CV plots for m-LDH/NRG NHs, NRG and pure Ni foam at a constant potential scan rate, and CV plots for m-LDH/NRG NHs, NiCoAl-LDH and m-LDH and at different potential scan rates (**Figure S10**)

(11) The detailed data for XPS spectra of m-LDH/NRG NHs, pure m-LDH and unmodified NiCoAl-LDH nanosheets (**Table S1**)

(12) ICP data for pure NiCoAl-LDH and m-LDH nanosheets (**Table S2**)

(13) The detailed integral areas of O1s peaks for NiCoAl-LDH and m-LDH nanosheets (**Table S3**)

(14) Comparing the electrochemical performance of m-LDH/NRG NHs with other reported electrode materials (**Table S4**)

(15) References

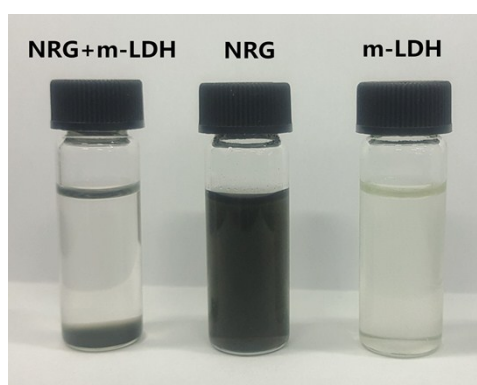

**Fig. S1** Digital photographs for the dispersions of m-LDH/NRG NHs as well as pure m-LDH and NRG dispersions.

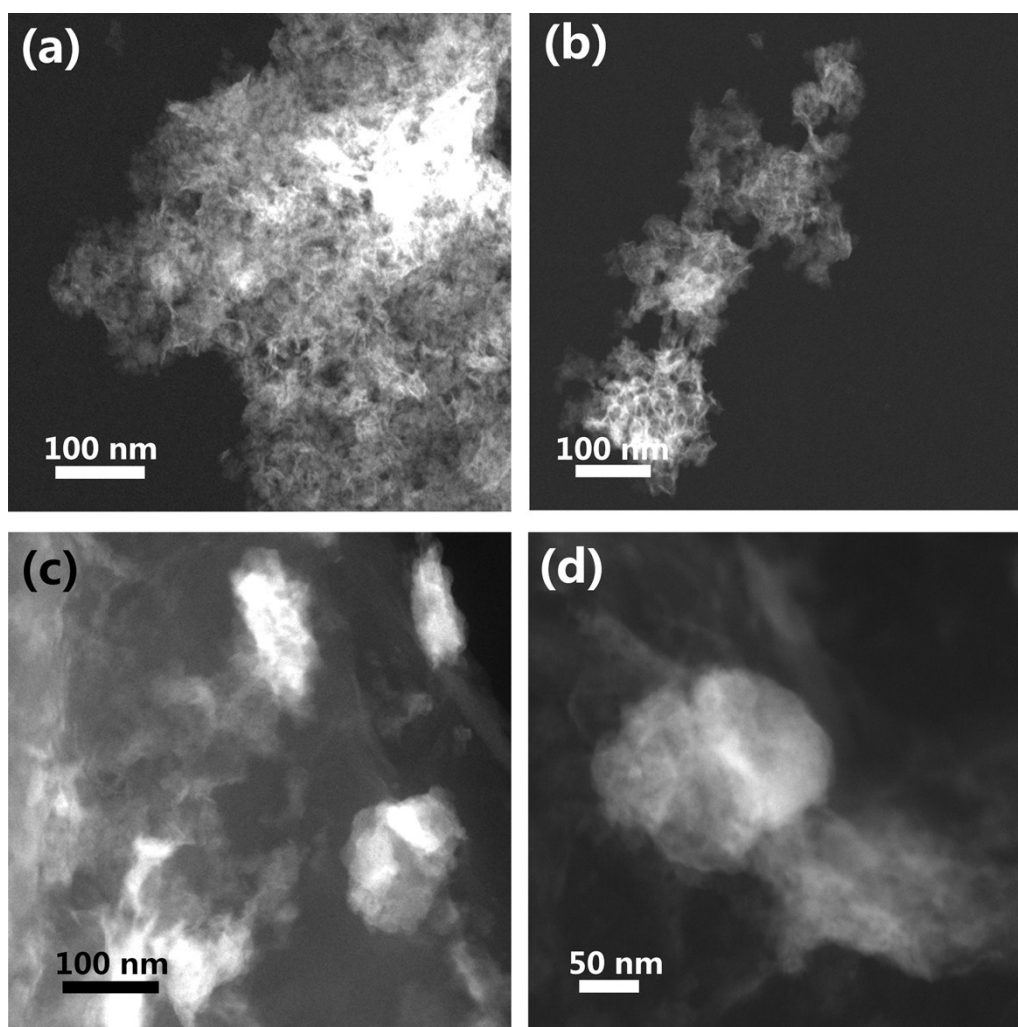

**Fig. S2** (a-b) Low-magnification HAADF-STEM images of NiCoAl-LDH (a) and m-LDH (b) nanosheets. (c-d) Low and high-magnification HAADF-STEM images for m-LDH/NRG NHs.

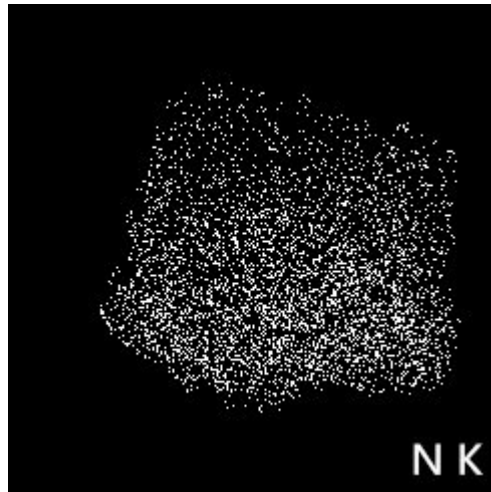

**Fig. S3** The mapping analysis for N element in the m-LDH/NRG NHs.

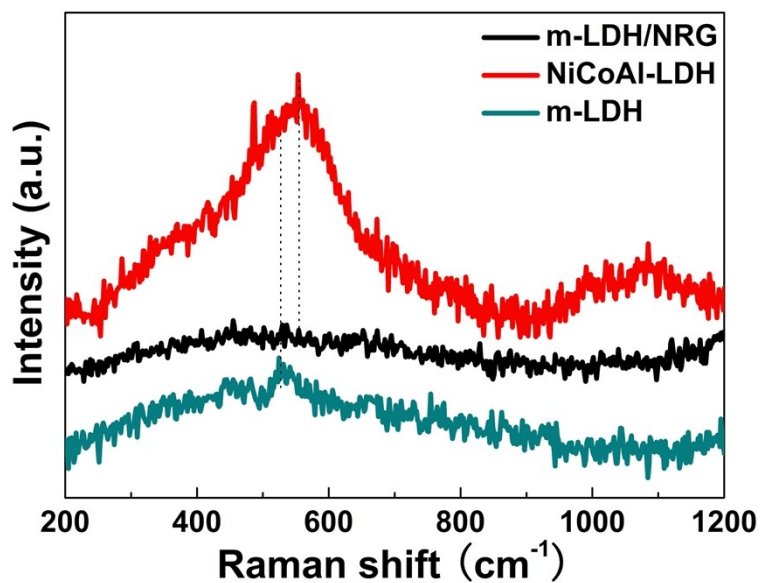

**Fig. S4** Comparing the Raman spectra of m-LDH/NRG NHs, NiCoAl-LDH and m-LDH nanosheets at the low wavenumber region (ranging from 200 to 1100 cm<sup>-1</sup>).

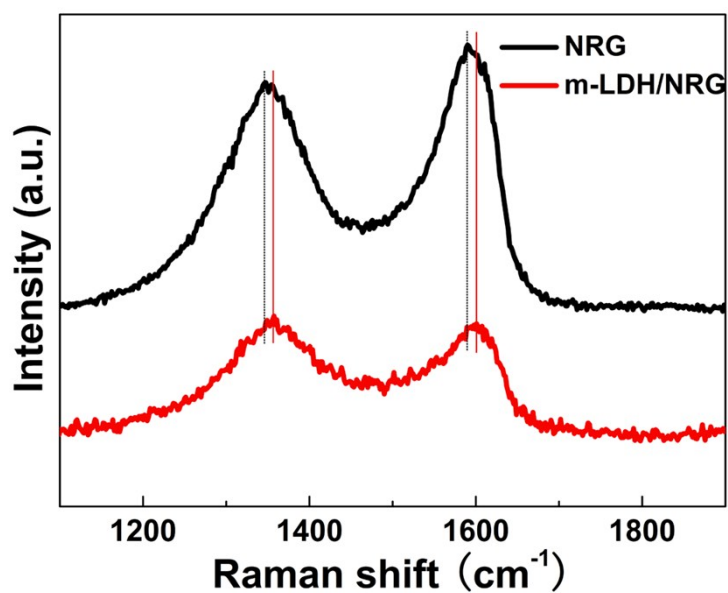

**Fig. S5** Comparing the Raman spectra of m-LDH/RGN NHs and pure m-LDH nanosheets at the high wavenumber region (ranging from 1100 to 1900 cm<sup>-1</sup>).

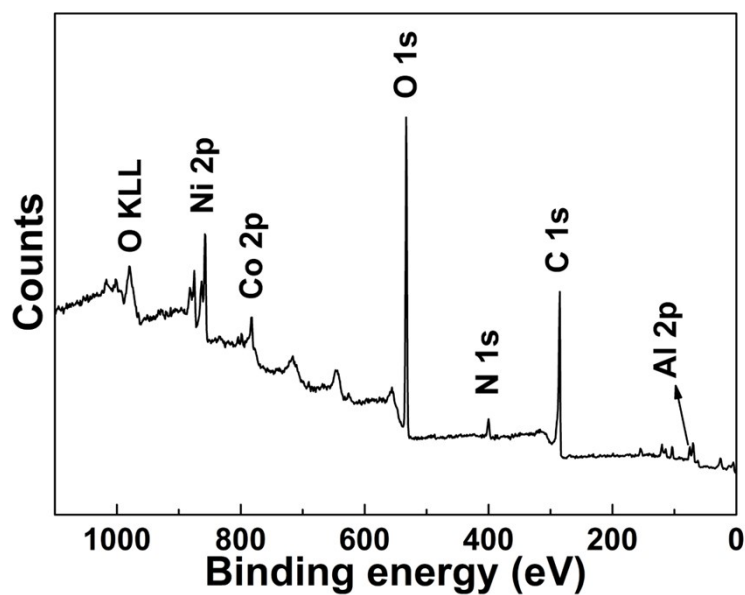

**Fig. S6** The survey XPS spectrum for m-LDH/NRG NHs.

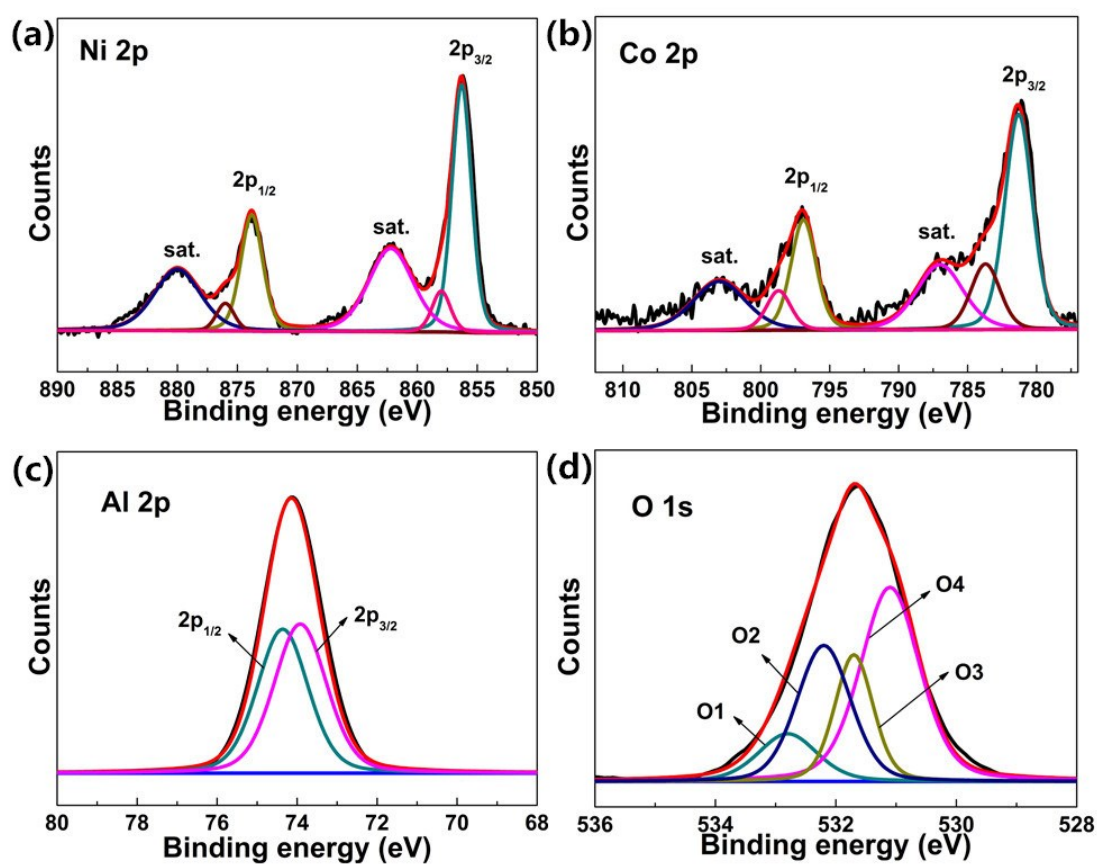

**Fig. S7** Fine core-level XPS spectra for Ni 2p (a), Co 2p (b), Al 2p (c) and O 1s(d) peaks of the unmodified NiCoAl-LDH nanosheets.

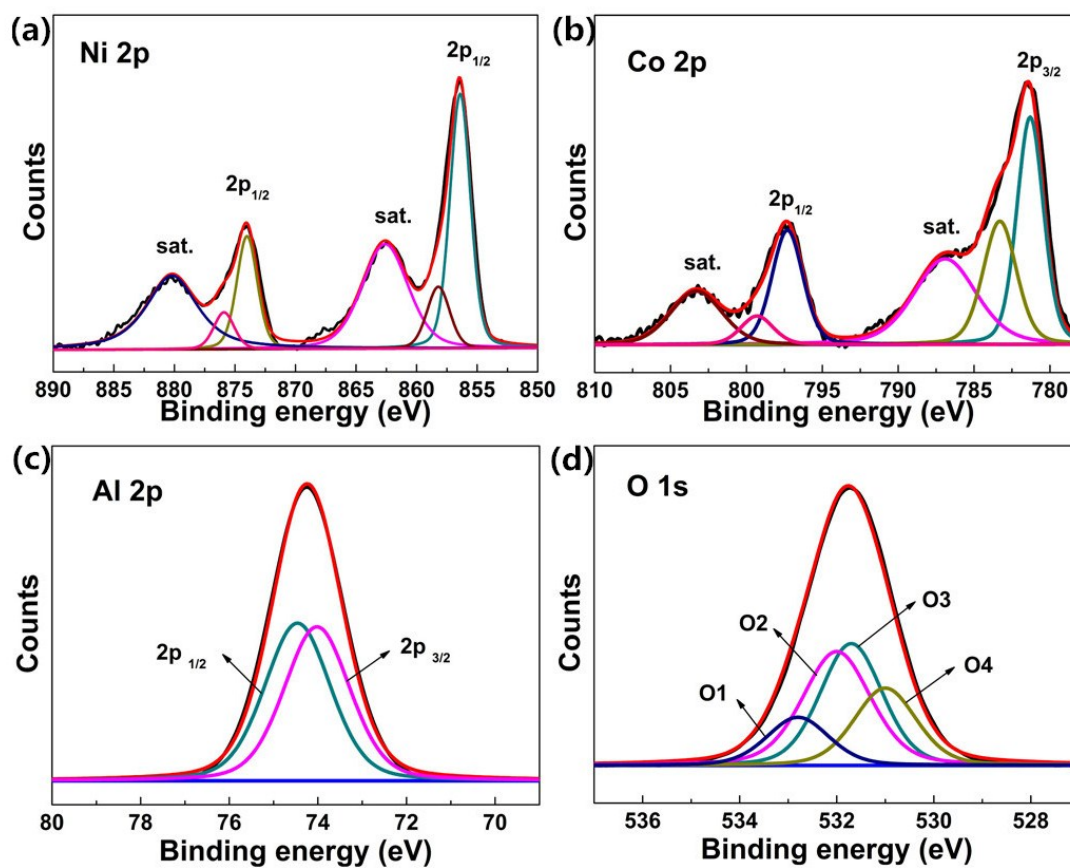

**Fig. S8** Fine core-level XPS spectra for Ni 2p (a), Co 2p (b), Al 2p (c) and O 1s(d) peaks of pure m-LDH nanosheets.

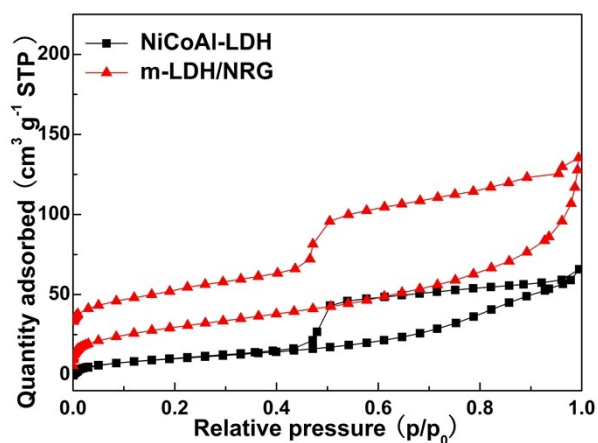

**Fig. S9**  $N_2$  adsorption-desorption isothermal plots for m-LDH/NRG NHs and the unmodified NiCoAl-LDH nanosheets.

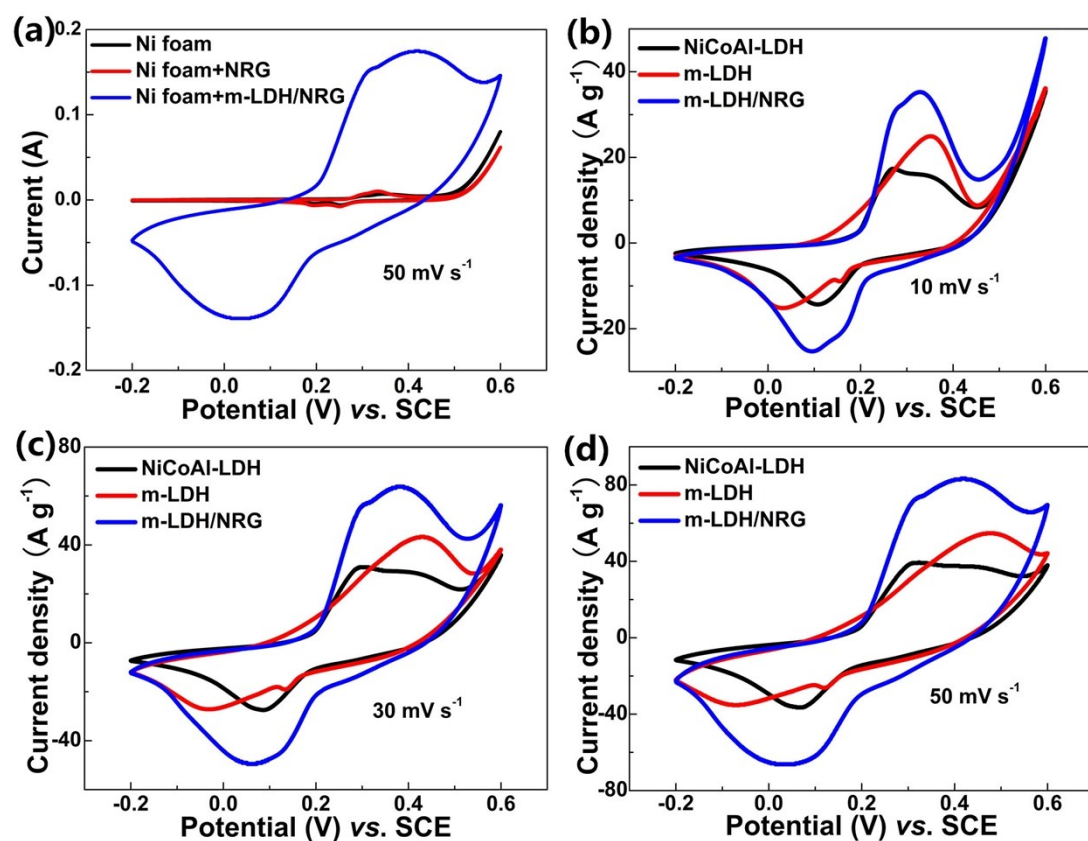

**Fig. S10** (a) Comparing the CV curves of m-LDH/NRG NHs with that of pure NRG nanosheets and pure Ni foam at the potential scan rate of 50 mV s<sup>-1</sup>. (b-d) Comparing the CV curves of m-LDH/NRG NHs with that of NiCoAl-LDH and m-LDH nanosheets at the potential scan rate of 10, 30 and 50 mV s<sup>-1</sup>, respectively.



**Table S1** The detailed data for fitting the Ni 2p, Co2p, Al 2p and O1s fine XPS spectra of m-LDH/NRG NHs, pure m-LDH and unmodified NiCoAl-LDH

|    | Spin-orbit           | LDH     | m-LDH   | m-LDH/NRG |
|----|----------------------|---------|---------|-----------|
| Ni | 2p <sub>1/2</sub> +2 | 856.2eV | 856.5eV | 856.8eV   |
|    | 2p <sub>1/2</sub> +3 | 858.1eV | 858.2eV | 858.3eV   |
|    | 2p <sub>3/2</sub> +2 | 873.7eV | 874.0eV | 874.4eV   |
|    | 2p <sub>3/2</sub> +3 | 875.6eV | 875.9eV | 876.5eV   |
| Co | 2p <sub>1/2</sub> +2 | 783.7eV | 783.3eV | 783.9eV   |
|    | 2p <sub>1/2</sub> +3 | 781.2eV | 781.3eV | 781.8eV   |
|    | 2p <sub>3/2</sub> +2 | 798.7eV | 799.3eV | 800.1eV   |
|    | 2p <sub>3/2</sub> +3 | 796.9eV | 797.3eV | 797.8eV   |
| Al | 2p <sub>1/2</sub>    | 73.9eV  | 74.0eV  | 74.7eV    |
|    | 2p <sub>3/2</sub>    | 74.3eV  | 74.4eV  | 75.2eV    |
| O  | O <sub>1</sub>       | 532.8eV | 532.8eV | 533.6eV   |
|    | O <sub>2</sub>       | 532.1eV | 532.1eV | 532.6eV   |
|    | O <sub>3</sub>       | 531.7eV | 531.7eV | 532.2eV   |
|    | O <sub>4</sub>       | 531.1eV | 531.1eV | 531.6eV   |

**Table S2** ICP test results for the content of Co, Al and Ni in NiCoAl-LDH and m-LDH nanosheets

| Sample     | Element | Ion concentration ( $\mu\text{g mL}^{-1}$ ) | Mass percent |
|------------|---------|---------------------------------------------|--------------|
| NiCoAl-LDH | Co      | 0.703                                       | 7.0%         |
|            | Al      | 0.415                                       | 4.2%         |
|            | Ni      | 2.061                                       | 20.6%        |
| m-LDH      | Co      | 0.592                                       | 5.9%         |
|            | Al      | 0.314                                       | 3.1%         |
|            | Ni      | 1.839                                       | 18.4%        |

[Notes]: For ICP tests, the NiCoAl-LDH and m-LDH nanosheets with the same mass were dissolved in 6 mL concentrated nitric acid, respectively. Then, these solution were added into 100 mL flask and diluted to 100 mL, respectively. The content of various metal elements were examined by ICP.

**Table S3.** The detailed integral areas of O1s peaks for NiCoAl-LDH and m-LDH nanosheets

| peaks               | NiCoAl-LDH<br>(integration area) | m-LDH<br>(integration area) |
|---------------------|----------------------------------|-----------------------------|
| O1 H <sub>2</sub> O | 26204                            | 45757                       |
| O2 O-H              | 65340                            | 121574                      |
| O3 oxygen vacancies | 44633                            | 114272                      |
| O4 M-OH             | 107492                           | 73501                       |

[Notes]: By calculating from their integration areas, the content of O3 peak (O vacancies or defects) in m-LDH nanosheets (about 32.2%) is much higher than that of unmodified NiCoAl-LDH nanosheets (18.3%), implying that etching Al atoms can create more oxygen vacancies in m-LDH in relative to unmodified NiCoAl-LDH. This is consistent with previously reported works (*e.g.*, *Chem. Eur. J.* **2016**, 22, 4000).

**Table S4** Comparing the electrochemical performance of m-LDH/NRG NHs with other reported electrode materials

| Electrode materials                              | Specific capacitance (F g <sup>-1</sup> ) | Rate performance            | Capacitance retention (cycles) | Literatures |
|--------------------------------------------------|-------------------------------------------|-----------------------------|--------------------------------|-------------|
| NiCoAl-LDH/<br>NRG                               | 1877 (1 A g <sup>-1</sup> )               | 72% (10 A g <sup>-1</sup> ) | 74% (5000)                     | This work   |
| NiAl-LDH/rGO                                     | 1630 (1 A g <sup>-1</sup> )               | 17% (10 A g <sup>-1</sup> ) | 95% (1500)                     | Ref S1      |
| CoMn-LDH/<br>rGO                                 | 1635 (1 A g <sup>-1</sup> )               | 71% (10 A g <sup>-1</sup> ) | 100%<br>(10000)                | Ref S2      |
| 3D NiCoMn<br>-LDH/rGO                            | 912 (1 A g <sup>-1</sup> )                | 81% (10 A g <sup>-1</sup> ) | 64% (5000)                     | Ref S3      |
| CNT@NiCo <sub>2</sub> O <sub>4</sub>             | 1038<br>(0.5 A g <sup>-1</sup> )          | 64% (10 A g <sup>-1</sup> ) | 100%<br>(1000)                 | Ref S4      |
| CoAl-LDH/rGO                                     | 825 (1 A g <sup>-1</sup> )                | 62% (8 A g <sup>-1</sup> )  | 89% (4000)                     | Ref S5      |
| Ni <sub>1-x</sub> Co <sub>x</sub> Al-<br>LDH/rGO | 1902 (1 A g <sup>-1</sup> )               | 75% (10 A g <sup>-1</sup> ) | 62% (1500)                     | Ref S6      |
| Ni <sub>x</sub> Co <sub>1-x</sub> S <sub>8</sub> | 1404 (2 A g <sup>-1</sup> )               | 38% (9A g <sup>-1</sup> )   | 75% (2000)                     | Ref S7      |
| α-(Ni/Co)(OH) <sub>2</sub><br>/graphene          | 1809<br>(0.5 A g <sup>-1</sup> )          | 84% (40 A g <sup>-1</sup> ) | 83% (1000<br>0)                | Ref S8      |
| NiV-LDH                                          | 1581 (1 A g <sup>-1</sup> )               | 77% (1 A g <sup>-1</sup> )  | 40%<br>(10000)                 | Ref S9      |

|                                          |                             |                              |            |         |
|------------------------------------------|-----------------------------|------------------------------|------------|---------|
| CoAl-LDH@<br>CoS                         | 1205 (1 A g <sup>-1</sup> ) | 941 (10 A g <sup>-1</sup> )  | 88% (2000) | Ref S10 |
| CoAl-LDH/<br>graphene                    | 1296 (1 A g <sup>-1</sup> ) | 43% ((10 A g <sup>-1</sup> ) | 90% (1000) | Ref S11 |
| HMCS/Ni(OH) <sub>2</sub>                 | 1632 (1 A g <sup>-1</sup> ) | 61% (10 A g <sup>-1</sup> )  | 81% (3000) | Ref S12 |
| MoO <sub>3</sub> /Ni(OH) <sub>2</sub>    | 1622 (1 A g <sup>-1</sup> ) | 26% ( 10 A g <sup>-1</sup> ) | 80% (3000) | Ref S13 |
| Ni(OH) <sub>2</sub> /3D<br>graphite foam | 1500 (1 A g <sup>-1</sup> ) | 67% (10 A g <sup>-1</sup> )  | 65% (1000) | Ref S14 |

**[Notes]:** The abbreviation of “LDH” stands for the “layered double hydroxides”, and the abbreviation of “NRG” represents “N-doped reduced graphene oxide”. The “rGO” stands for “reduced graphene oxide”.

## References

- 1 Y. Wimalasiri, R. Fan. X. S. Zhao, L. Zou, *Electrochim. Acta*, 2014, **134**, 127.
- 2 M. Li, J. P. Chen, J. Wang, F. Liu, X. B. Zhang, *Electrochim. Acta*, 2016, **206**, 108.
- 3 M. Li, J. P. Cheng, F. Liu, X. B. Zhang, *Chem. Phys. Lett.*, 2015, **640**, 5.
- 4 F. Cai, Y. Kang, H. Chen, M. Chen, Q. Li, *J. Mater. Chem. A*, 2014, **2**, 11509.
- 5 Y. Y. Zhong, Y. Q. Liao, A. M. Gao, J. N. Hao, D. Shu, Y. L. Huang, J. Zhong, C. He and R. H. Zeng, *J. Alloys Compd.*, 2016, **669**, 146-155.
- 6 J. Xu, S. L. Gai, F. He, N. Niu, P. Gao, Y. J. Chen, P. P. Yang, *Dalton. Trans.*, 2014, **43**, 11667.
- 7 Y. F. Zhang, C. C. Sun, H. Q. Su, W. Huang and X. C. Dong, *Nanoscale*, 2015, **7**, 3155.

- 8 Y. Z. Chen, W. K. Pang, H. H. Bai, T. F. Zhou, Y. N. Liu, S. Li and Z. P. Guo, *Nano Lett.*, 2017, **17**, 429.
- 9 A. Tyagi, M. C. Joshi, A. Shah, V. K. Thakur and R. K. Gupta, *ACS Omega*, 2019, **4**, 3257.
- 10 Y. B. Dou, J. Zhou, F. Yang, M. J. Zhao, Z. R. Nie and J. R. Li, *J. Mater. Chem. A*, 2016, **4**, 12526.
- 11 Z. C. Huang, S. L. Wang, J. P. Wang, Y. M. Yu, J. J. Wen and R. Li, *Electrochim. Acta*, 2015, **152**, 117.
- 12 Y. S. Fu, Y. Zhou, Q. Peng, C. Y. Yu, Z. Wu, J. W. Sun, J. W. Zhu and X. Wang, *J. Power Sources*, 2018, **402**, 43.
- 13 L. L. Zhu, C. K. N. Peh, T. Zhu, Y. F. Lim and G. W. Ho, *J. Mater. Chem. A*, 2017, **5**, 8343-8351.
- 14 J. Y. Ji, L. L. Zhang, H. X. Ji, Y. Li, X. Zhao, X. Bai, X. B. Fan, F. B. Zhang and R. S. Ruoff, *ACS Nano*, 2013, **7**, 6237-6243.
